# Supplementary material
Source: PubMed Central journal article supplement (PMC6754308)
Supplement: NIHMS1535612-supplement-1.pdf [file NIHMS1535612-supplement-1.pdf]

## SUPPLEMENTAL DATA

### Table of Contents

|                                                                                                                                                                 |    |
|-----------------------------------------------------------------------------------------------------------------------------------------------------------------|----|
| Title page .....                                                                                                                                                | 1  |
| Table of content .....                                                                                                                                          | 2  |
| <b>Fig. S1:</b> TCH-165 Inhibits autophagy flux in U-87 MG: Immunoblot of LC3B .....                                                                            | 3  |
| <b>Fig. S2:</b> TCH-165 inhibits torin1-induced autophagy in RPMI and HEK 293T cells: Immunoblot of LC3B and p62 ..                                             | 4  |
| <b>Fig. S3:</b> TCH-165 inhibits autophagosome-lysosome fusion in HEK cells: Confocal immunofluorescence of HEK cells transduced with tandem-RFP-GFP-LC3B ..... | 6  |
| <b>Fig. S4:</b> Co-overexpression of FLAG-SNAP29 and FLAG-STX17 ameliorates TCH-165 mediated accumulation of autophagic vacuoles in HEK 293T cells.....         | 7  |
| <b>Fig. S5:</b> Reversibility of the effect of TCH-165.....                                                                                                     | 8  |
| <b>Fig. S6:</b> The Effect of TCH-165 does not involve induction of oxidative stress.....                                                                       | 9  |
| <b>Table S1:</b> Primers for SNAP29, STX17, VAMP8, LC3B, p62 and GAPDH.....                                                                                     | 10 |

**A**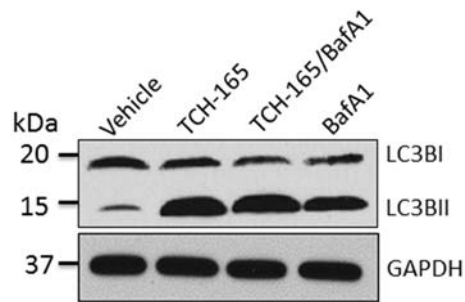**B**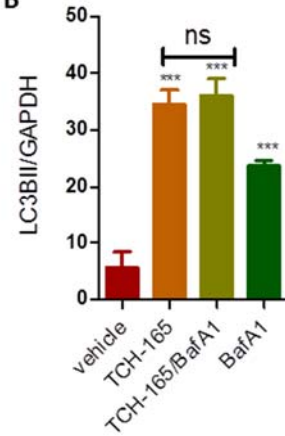

**Figure S1: TCH-165 Inhibits autophagy flux in U-87 MG. Related to Figure 2** (A) U-87MG cells were treated with either vehicle (DMSO) or TCH-165 (10  $\mu$ M) for 16h, followed by treatment with bafilomycin A1 (100 nM) for 4h. Conversion of LC3BI to LC3BII was detected by immunoblot with LC3B-specific antibody. All statistical analyses were performed on densitometry data (imageJ) of five individual experiments. (B) Data are graphed as mean  $\pm$  SD (n=3) and were analyzed by One-Way ANOVA with Bonferroni's multiple comparison test (ns=not significant, \*p<0.05, \*\*p<0.01, \*\*\*p<0.001).

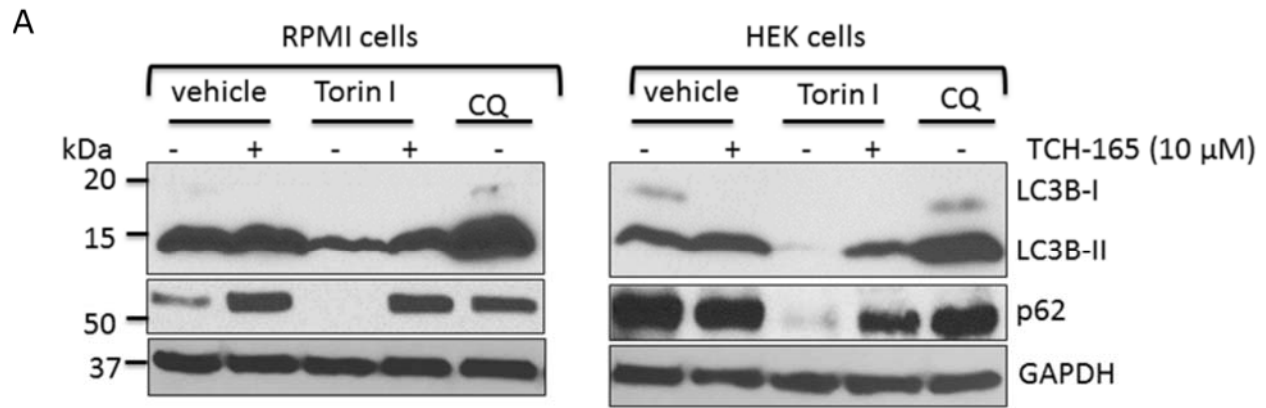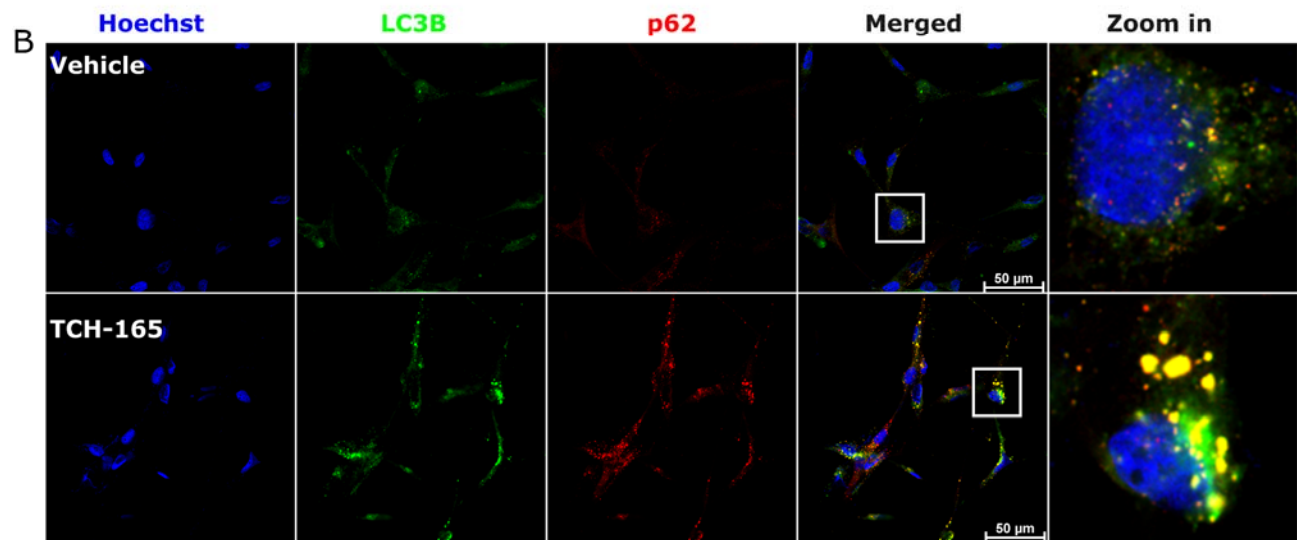

**Figure S2: TCH-165 inhibits torin1-induced autophagy in RPMI and HEK 293T cells. Related to Figure 2. (A)** RPMI (left) or HEK 293T (right) cells were treated with either vehicle, torin1 (200 nM), TCH-165 (10  $\mu$ M) chloroquine (CQ; 50  $\mu$ M) or combinations for 16h. Cell lysates were immunoblotted for LC3B, p62 and GAPDH. **(B)** U-87MG cells were treated with either vehicle or TCH-165 (10  $\mu$ M) for 24h. Cells were fixed with methanol and immunostained with LC3B specific/Alexa Fluor 488 (green) antibody, p62 specific/Alexa Fluor 594 (red) antibody and Hoechst DNA dye (blue). Images were taken with an upright Nikon A1 confocal microscope using a 60x Plan Apo oil objective, with standard filter for DAPI, GFP and RFP. White square boxes indicate zoomed in areas showing accumulation/co-localization of p62 and LC3B in autophagic vacuoles, for TCH-165 treated cells compared to vehicle control.

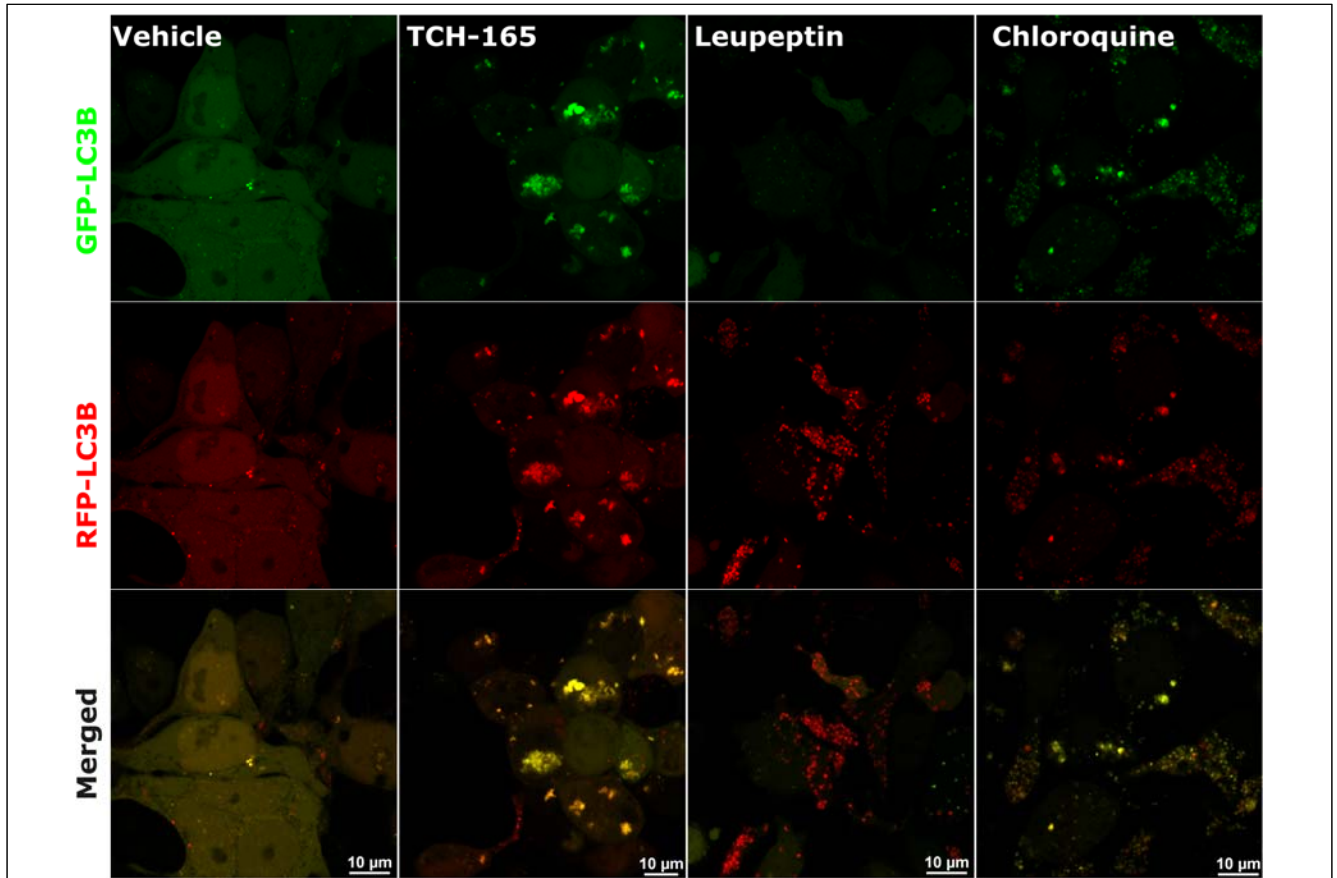

**Figure S3: TCH-165 inhibits autophagosome-lysosome fusion in HEK cells. Related to Figure 3.** HEK293T cells were transduced with 30 particles per cell of tandem-RFP-GFP-LC3B and cultured for 24h. Cells were then incubated with either vehicle, TCH-165 (10  $\mu$ M), Chloroquine (100  $\mu$ M) or Leupeptin A (200  $\mu$ M) for an additional 24h. Cells were imaged on an upright Nikon A1 confocal microscope using standard filter sets for GFP

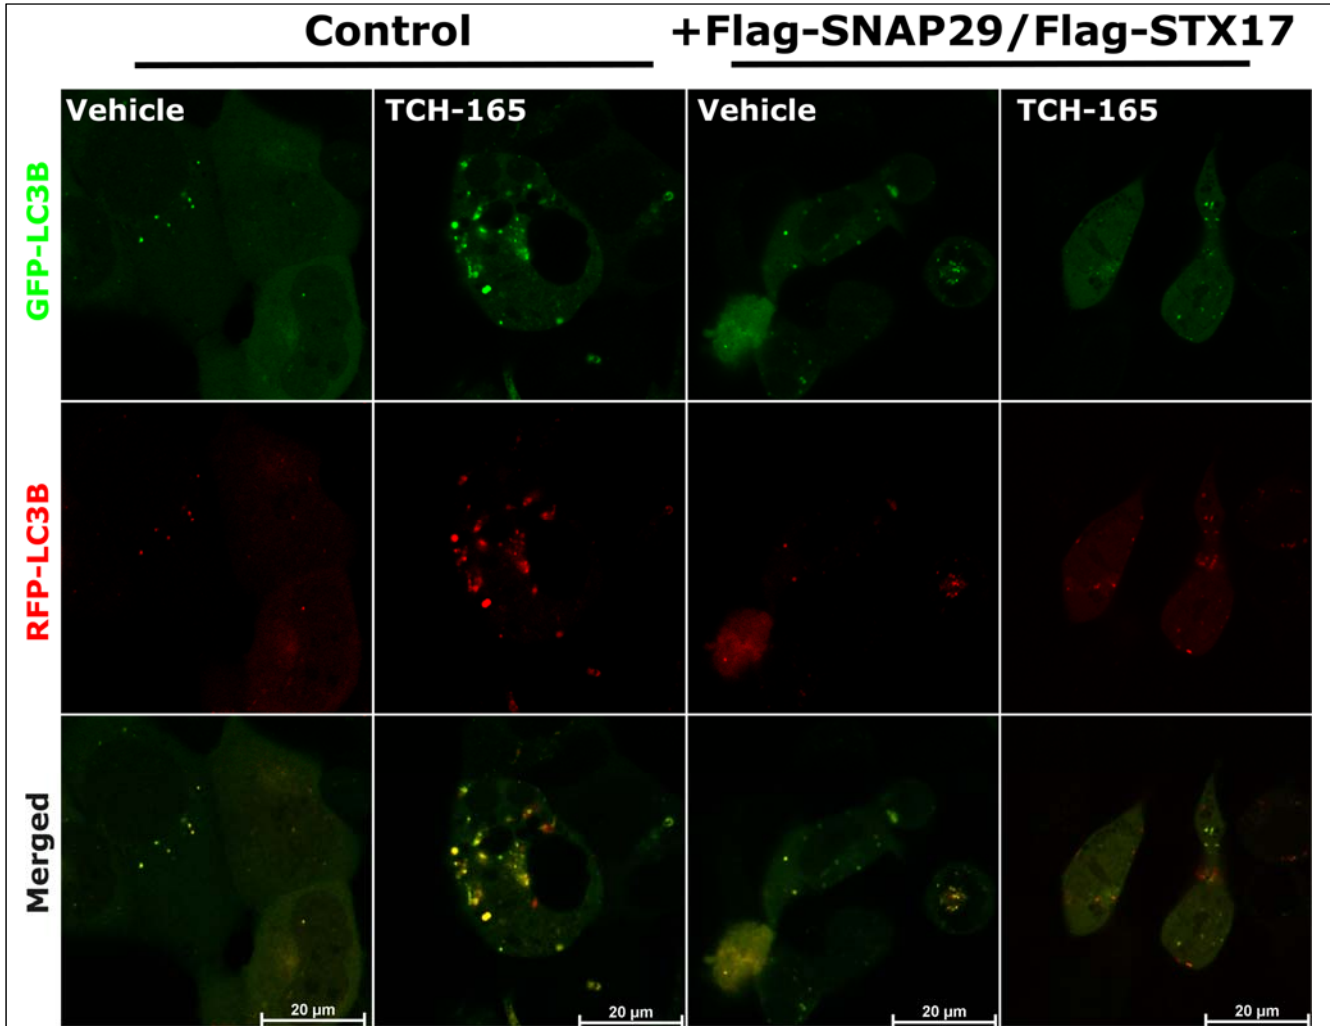

**Figure S4: Co-overexpression of FLAG-SNAP29 and FLAG-STX17 ameliorates TCH-165 mediated accumulation of autophagic vacuoles. Related to Figure 5.** HEK 293T cells were co-transfected with FLAG-SNAP29 and FLAG-STX17 for 8h. Both wild type (WT) and FLAG SNAP29/FLAG STX17 cells were further transduced with 30 particles per cell of tandem-RFP-GFP-LC3B and cultured for 24h. Cells were then incubated with either vehicle or TCH-165 (10  $\mu$ M) for an additional 16h. Live cells were imaged on a Nikon A1 confocal microscope using a 60x Plan Apo oil objective with standard filter sets for GFP and RFP. In the merged images, red puncta represent autolysosomes while yellow puncta represent autophagosome.

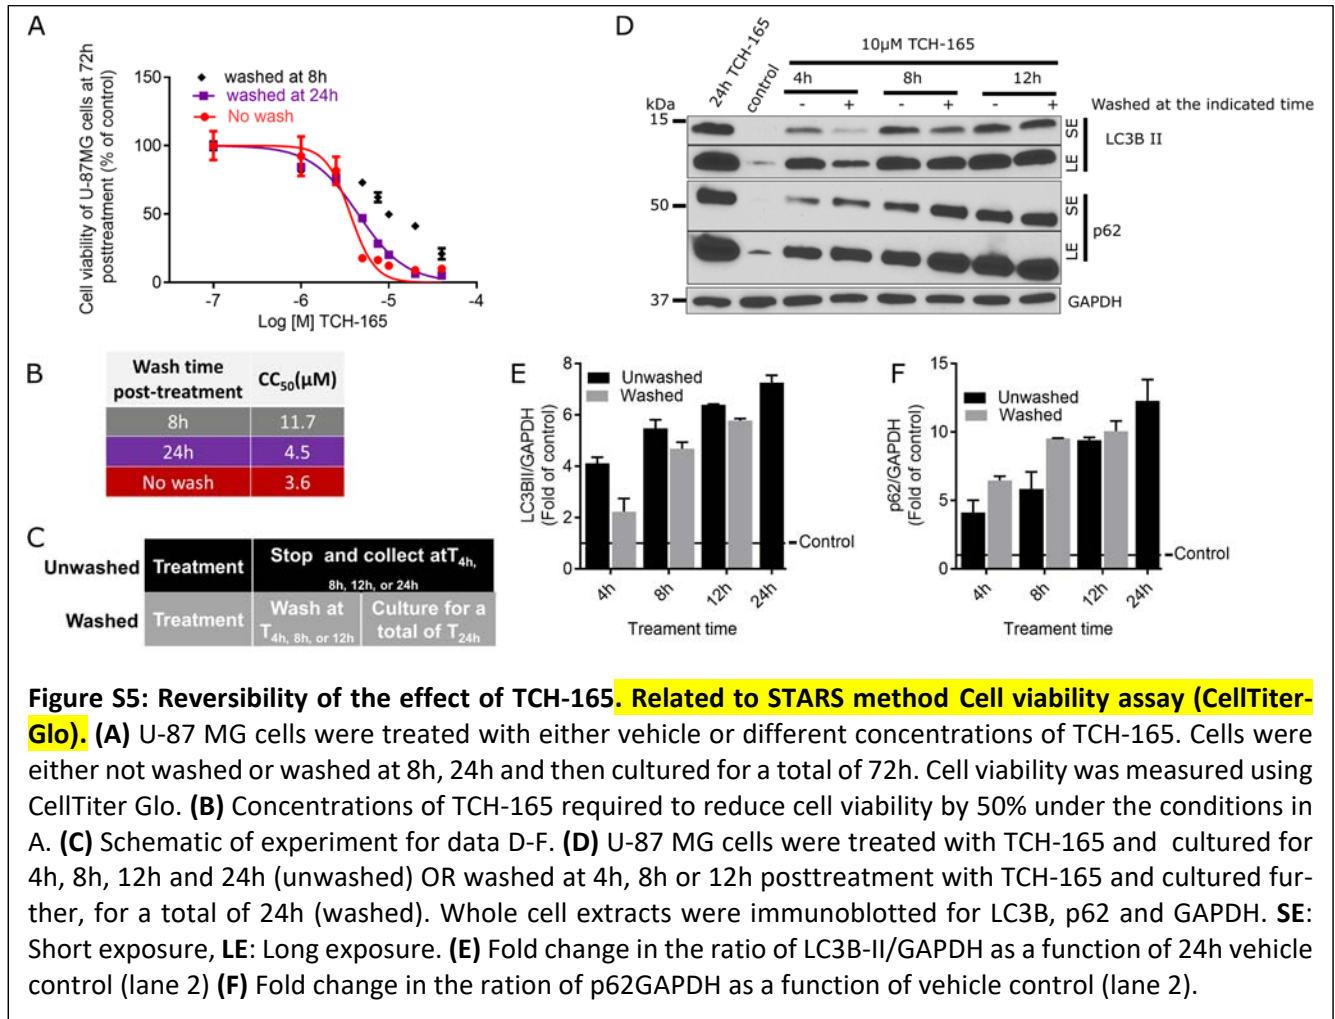

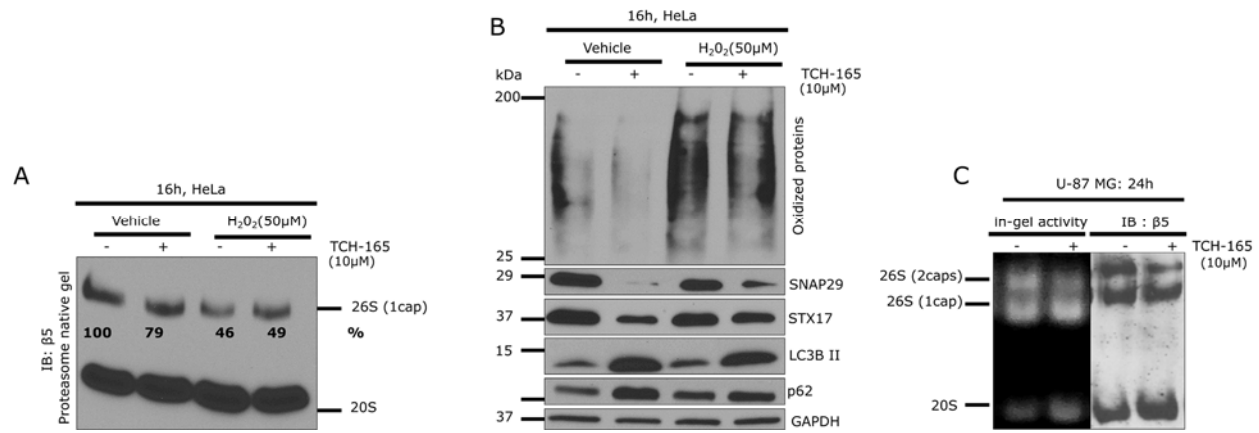

**Figure S6: TCH-165 does not act via induction of oxidative stress. Related to STARS method OxyBlot (protein carbonyl quantification).** HeLa cells were treated with either vehicle, TCH-165 (10 μM), hydrogen peroxide (H<sub>2</sub>O<sub>2</sub>; 50 μM) or combinations for 16h. Samples were either immunoblotted under native conditions for proteasome subcomplexes (A), derivatized with DNPH for oxidized proteins (B, top panel) or immunoblotted for the indicated proteins (B, bottom panels). (C) Proteasome native gel for U-87 MG cells treated with vehicle or TCH-165 (10μM) for 24h and exposed to 20S CT-L substrate (Suc-LLVY-AMC) to check for activity (left) and immunoblotted (right) to check for changes in proteasome subcomplexes.

**Table S1.** Primers for SNAP29, STX17, VAMP8, LC3B, p62 and GAPDH, Related to Figure 4

|                            |                        |                        |
|----------------------------|------------------------|------------------------|
|                            |                        |                        |
| SNAP 29<br>NM_004782.3     | GTGCTGCAACAGTGCATTAG   | CCTATGGAGGCTGTGGATATTT |
| Syntaxin 17<br>NM_017919.2 | GGGTCATCCATTCTCCTTTACC | GCTGGACACTCAGTAAGGAATC |
| VAMP8<br>NM_003761.4       | CATCTCCGCAACAAGACAGA   | CTTCACGTTCTTCCACCAGAA  |
| LC3B<br>NM_022818.4        | CATCACAGTTGGCACAAACG   | GACTTTGGGTGTGGTTCTCTTA |
| P62<br>NM_003900.4         | CTCTGGACACCATCCAGTATTC | TGCAATTCTACGCAAGCTTAAC |
| GAPDH<br>NM_002046.6       | CAGCCTCAAGATCATCAGCA   | GTCATGAGTCCTTCCACGATAC |
